# Supplementary material for: TORC1 signaling inhibition by rapamycin and caffeine affect lifespan, global gene expression, and cell proliferation of fission yeast
Source: PubMed Central journal article supplement (PMC3798131; doi:10.1111/acel.12080), 2013-05-02
Supplement: acel0012-0563-sd1.pdf [file acel0012-0563-sd1.pdf]

**Figure S1.**

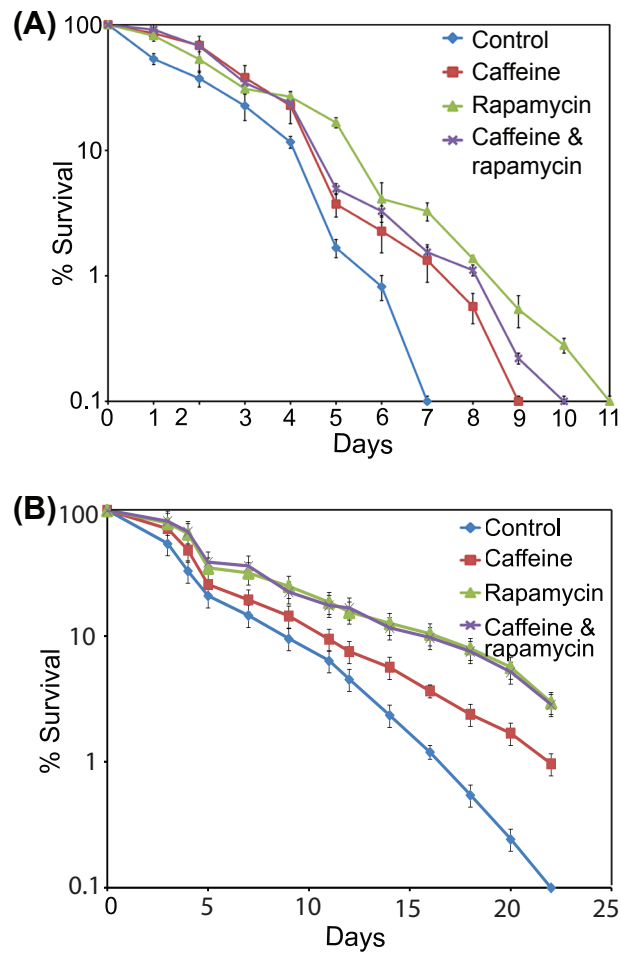

**Fig.S1.** Representation of CLS assays in a logarithmic scale shows differences in medial lifespans.

(A) CLS assay performed in YES media and shown in Fig.1C, here with cells survival shown in linear scale instead of logarithmic.

(B) CLS assay performed in EMM media and shown in Fig.1D here with cells survival shown in linear scale instead of logarithmic. Caffeine and rapamycin concentrations are 10 mM and 100  $\mu$ g/ml respectively in both panels.
