# Supplementary material for: TORC1 signaling inhibition by rapamycin and caffeine affect lifespan, global gene expression, and cell proliferation of fission yeast
Source: PubMed Central journal article supplement (PMC3798131; doi:10.1111/acel.12080), 2013-05-02
Supplement: acel0012-0563-sd4.pdf [file acel0012-0563-sd4.pdf]

**Figure S4.**

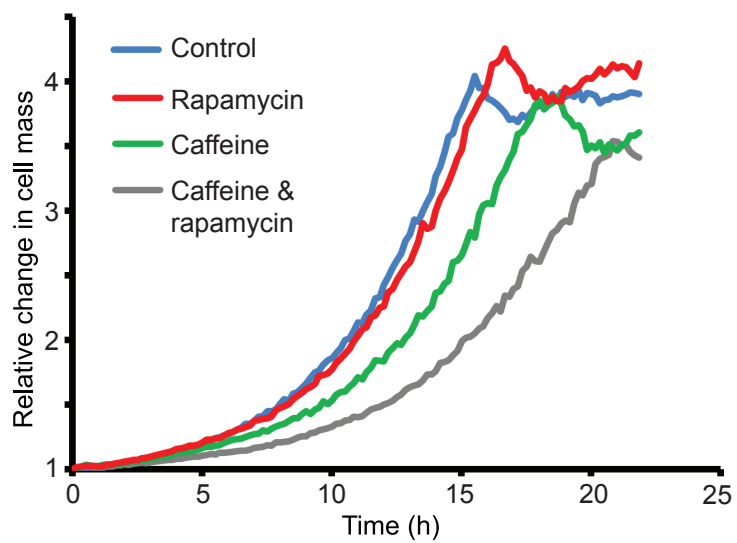

**Fig. S4** Growth curves of wild-type cells in liquid EMM medium without (control) or with different drug treatments as indicated.
